# Supplementary material for: (S)-2-(Cyclobutylamino)-N-(3-(3,4-dihydroisoquinolin-2(1H)-yl)-2-hydroxypropyl)isonicotinamide Attenuates RANKL-Induced Osteoclast Differentiation by Inhibiting NF-κB Nuclear Translocation
Source: MDPI journal article supplement (doi:10.3390/ijms24054327), 2023-02-21
Supplement: s1 [file s1]

## Supplementary Materials

### (S)-2-(Cyclobutylamino)-N-(3-(3,4-dihydroisoquinolin-2(1H)-yl)-2-hydroxypropyl)isonicotinamide attenuates RANKL-induced osteoclast differentiation by inhibiting NF- $\kappa$ B nuclear translocation

#### Supplementary results

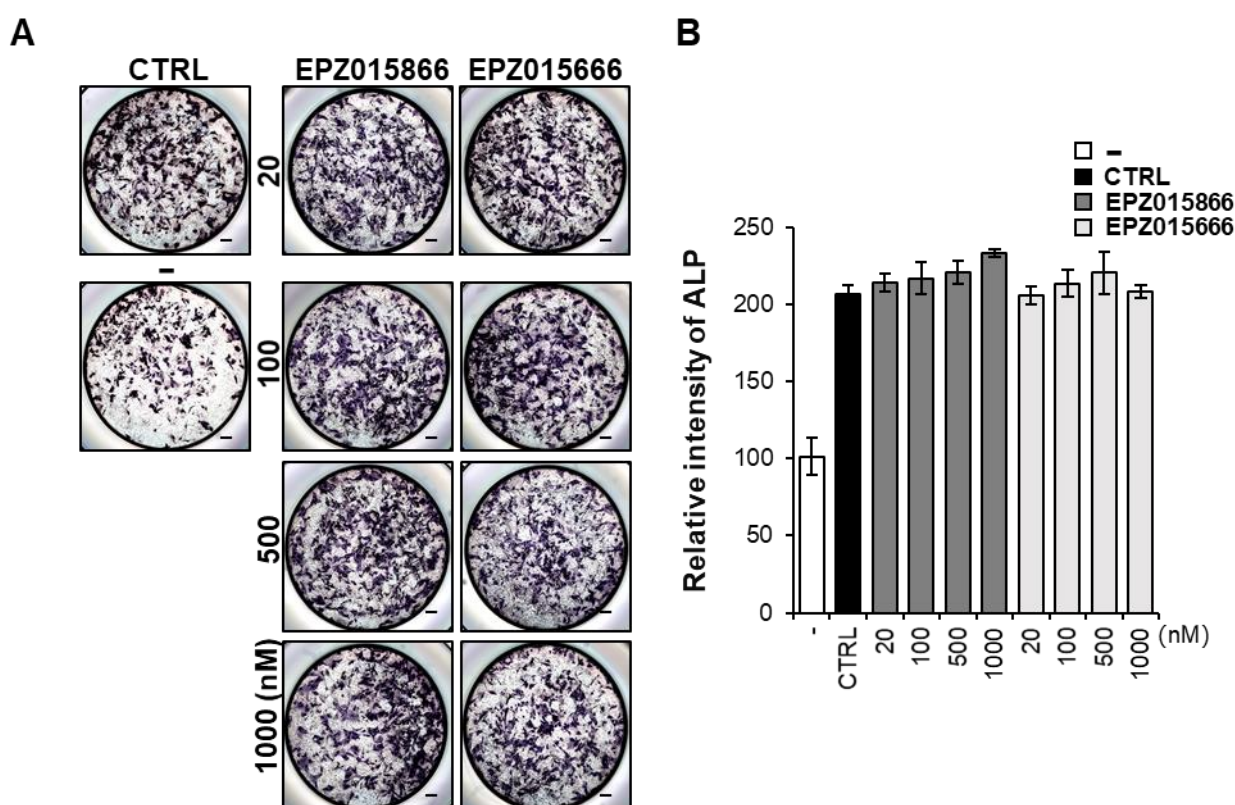

**Figure S1.** EPZ compounds did not affect the osteoblast formation. **(A)** Representative images of ALP staining showed mouse primary pre-osteoblast cells were cultured with BMP2 (100 ng/mL) in the presence or absence of different doses of EPZ compounds (20, 50, 100, 500, and 1000 nM) for 7 days. Scale bar represents 400  $\mu$ m. **(B)** Quantified analysis of ALP staining intensity. “-” indicates cells were not treated with BMP2 and “CTRL” indicates the control group (cells were treated with BMP2).

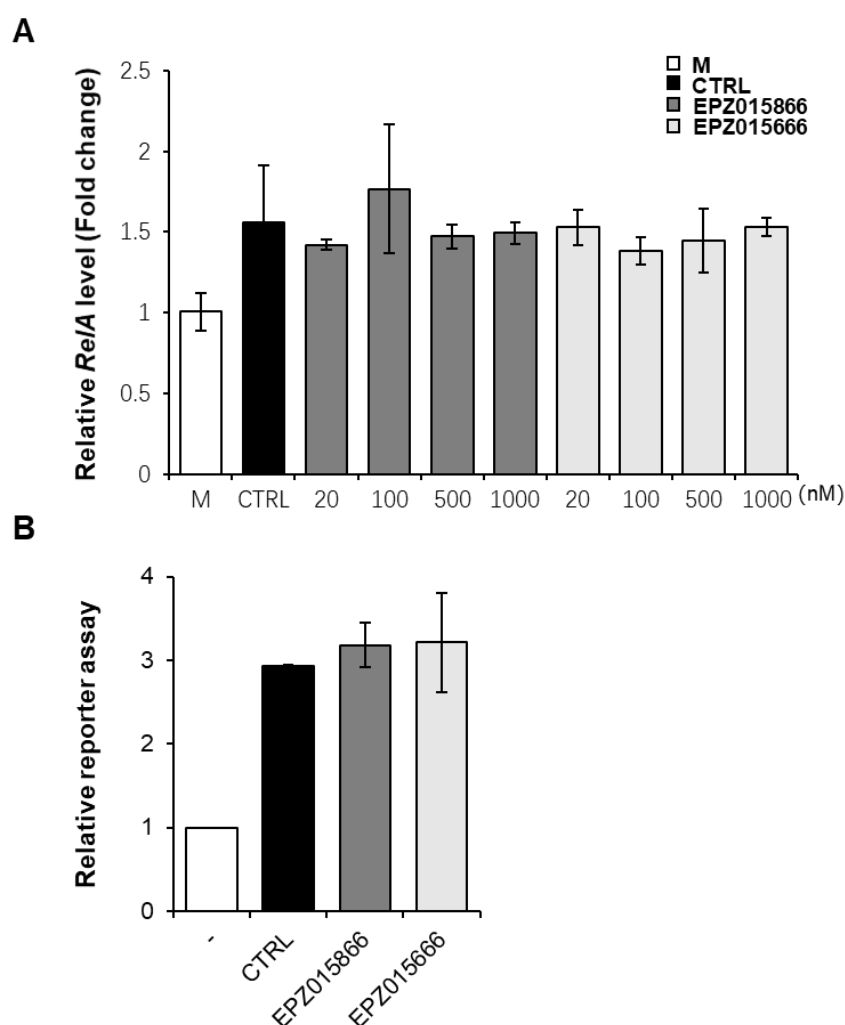

**Figure S2.** NF- $\kappa$ B transcriptional activity was not altered by EPZ compounds. **(A)** The mRNA levels of RelA (p65) in BMMs were determined by qRT-PCR after RANKL or indicated concentrations of EPZ compounds for 4 days. **(B)** The NF- $\kappa$ B reporter HEK293 cell line were incubated with or without 1000 nM of EPZ compounds for 24 hours and then stimulated with RANKL for 6 hours. NF- $\kappa$ B luciferase assay was performed. The data presented are the mean  $\pm$  SD.

**Table S1.** Primer sequences used for real-time PCR analysis.

| Gene (mouse)    | Primer Sequence (5'-3')    |
|-----------------|----------------------------|
| <i>Ctsk</i>     | F: ACTTCCGCAATCCTTACCGA    |
|                 | R: TTCGCTAGGCTCTTTTCGGA    |
| <i>Dc-stamp</i> | F: CGCACGATGCTTCATTCTTC    |
|                 | R: CAGTGCCAGCCGCAATC       |
| <i>Oc-stamp</i> | F: CAGAGTGACCACCTGAACAAACA |
|                 | R: TGCCTGAGGTCCCTGTGACT    |
| <i>Acp5</i>     | F: TTTATGCTGGACACAGTGATGCT |
|                 | R: CCCAGGTCTCGAGGCATT      |
| <i>Mmp9</i>     | F: CTGGACAGCCAGACACTAAAG   |
|                 | R: CTCGCGGCAAGTCTTCAGAG    |
| <i>Atp6v0d2</i> | F: GTGAGACCTTGGAAGACCTGAAA |
|                 | R: TCCTCATCTCCGTGTCAATTTTG |
| <i>Prmt5</i>    | F: CTGAATTGCGTCCCCGAAATA   |
|                 | R: AGGTTCTGAATGAAGTCCCT    |

---

|              |                                                    |
|--------------|----------------------------------------------------|
| <i>Gapdh</i> | F: TGTGTCCGTCGTGGATCTGA<br>R: GATGCCTGCTTCACCACCTT |
|--------------|----------------------------------------------------|

---

F: forward; R: reverse, Ctsk: cathepsin K.

### Supplementary Method

#### *NF-κB luciferase assay*

The NF-κB reporter HEK293 cell lines were seeded into 12-well plates at a density of  $1.0 \times 10^5$  per well. After 1 day, cells were incubated with or without 1000 nM of EPZ compounds for 24 hours, and then stimulated with RANKL for 6 hours. Harvest cells for NF-κB luciferase assay. NF-κB Luciferase activity was measured by a luciferase reporter assay system (Promega) and a luminometer (SpectraMax i3x, Molecular Devices) following the manufacturer's manual.
